# Supplementary material for: A therapeutic vaccine strategy to prevent Pneumocystis pneumonia in an immunocompromised host in a non-human primate model of HIV and Pneumocystis co-infection
Source: Front Immunol. 2022 Dec 6;13:1036658. doi: 10.3389/fimmu.2022.1036658 (PMC9763597; doi:10.3389/fimmu.2022.1036658)
Supplement: Supplementary file 1 [file Table_1.xlsx]

## Sheet: Extended Data Table 1
Extended Data Table 1: Clinical characteristics of SIV-infected rhesus macaques in Cohort 1
Animal	Sex	Age at infection (years)	Weight at infection (kg)	Chronic CD4+ (no. of cells/µL)	Peak viral load (no. of RNA copies/mL)	Viral set point (no. of RNA copies/mL)	Baseline KEX1 IgG Titer	Peak KEX1 IgG Titer Post Alum + KEX1 at (-6wpi)	KEX1 IgG Titer Nadir Post-SIV (8wpi)	Peak KEX1 IgG Titer Post α-GC+KEX1 Boost#1 (12wpi)	KEX1 IgG Titer at α-GC+KEX Boost#2 (14wpi)	Peak KEX1 IgG Titer Post α-GC+KEX1 Boost#2 (16wpi)	Pc Infection Status *	Timepoint at Pc Infection (weeks post infection)	Euthanasia Timepoint (weeks post infection)
Cohort 1 VAX (n=7)
66-15	Female	8.1	5.6	275.924	2.2 x 107	5.6 x 105	5066.67	2560000	21200	204800	76800	320000	Negative	--	41
68-15	Female	8.5	5.6	1088.99	2.5 x 106	1.0 x 105	3440	1920000	23133.3	97600	35600	102400	Negative	--	41
69-15	Female	6.3	5.7	543.12	7.0 x 107	6.9 x 106	560	1920000	12333.3	234667	57200	125333	Negative	--	41
72-15	Female	6.3	5.4	229.975	6.7 x 107	1.0 x 106	366.667	2560000	36800	298667	85200	1024000	Negative	--	41
74-15	Female	8.2	7.3	87.0463	2.0 x 107	1.3 x 106	2400	5120000	87680	768000	100400	1536000	Positive	32	32
79-15	Female	6.5	6.4	621.125	2.3 x 107	3.4 x 105	16000	2048000	49333.3	259200	57600	1280000	Negative	--	41
80-15	Female	6.3	4.9	379.19	4.3 x 106	5.4 x 106	0	5120000	341333	938667	192000	896000	Negative	--	38
81-15	Female	6.4	5.1	--	6.6 x 108	1.7 x 108	300	5120000	43000	--	--	--	Censored	Rapid Progressor	10
VAX Mean ± SD		7.2 ± 1.0	5.8 ± 0.8	461 ± 332	3.0 ± 2.8 x 107	2.2 ± 2.7 x 106	3,976 ± 5,613	3,035,429 ± 1,449,501	81,688 ± 117,197	400,229 ± 319,521	86,400 ± 51,159	754,819 ± 575,821	N/A	N/A	39 ± 3
Cohort 1 Sham (n=5)
67-15	Female	8.4	6.9	669.263	1.9 x 107	6.4 x 106	600	1400	1600	1400	0	1000	Censored	Persistent clinical decline due to leukemia	34
70-15	Female	8.3	6.5	277.929	1.1 x 107	2.7 x 106	200	3200	350	400	2400	1	Positive	40	40
71-15	Female	8.4	7.5	244.925	7.3 x 107	2.9 x 107	38400	1800	10000	19200	0	9000	Positive	25	25
73-15	Female	6.5	5.7	205.759	3.5 x 107	1.6 x 106	112.5	1200	600	700	133.333	400	Positive	40	40
75-15	Female	7.1	6.4	876.778	1.9 x 107	9.2 x 101	1400	3200	1000	1400	6933.33	2400	Censored	Elite controller	41
76-15	Female	6.9	6.1	1345.3	2.9 x 107	6.3 x 103	600	1800	6400	8000	9600	6400	Censored	Long term non progressor	41
77-15	Female	7.2	5.3	349.438	6.3 x 107	1.5 x 106	400	0	3200	6400	400	6400	Positive	40	41
78-15	Female	8.6	6.7	414.401	2.2 x 107	2.5 x 105	2933.33	1200	1200	4800	2533.33	5600	Negative	40	41
Sham Mean ± SD		7.8 ± 0.9	6.3 ± 0.9	298 ± 84	4.1 ± 2.6 x 107	6.9 x 106 ± 1.2 x 107	8409 ± 16806	1480 ± 1163	3070 ± 4032	6300 ± 7662	1093 ± 1263	4280 ± 3933	N/A	N/A	37 ± 7
Unpaired t-test (VAX vs Sham)		0.292371	0.336145	0.254841	0.51	0.44	0.596627	0.00146251	0.126374	0.017197	0.00450181	0.0136565	N/A	N/A	0.6
	Pc	Pneumocystis
	*	Pneumocystis infection status was determined by PCR and immunohistochemistry staining with monoclonal antibody
	N/A	Not applicable
	--	Data not available
	wpi	Weeks post-infection
